1 **Progressive sub-MIC Exposure of *Klebsiella pneumoniae* 43816 to Cephalothin Induces the**  
2 **Evolution of beta-lactam Resistance without Acquisition of beta-lactamase Genes**

3 Running Title: Antibiotic Resistance Evolved via sub-MIC Antibiotic Exposure

4 Jasmine R. Anderson, Nghi B. Lam, Jazmyne L. Jackson, Sean M. Dorenkott, Taylor Ticer, Emir  
5 Maldosevic, Amanda Velez, Megan R. Camden, and Terri N. Ellis\*

6 University of North Florida, Department of Biology, Jacksonville, Florida 32224

7

8 \*Correspondence:

9 Terri N. Ellis, Ph.D

10 University of North Florida

11 Department of Biology

12 1 UNF Drive

13 Building 59, Room 3312

14 Jacksonville, FL 32224

15 904-620-5766

16 [terri.ellis@unf.edu](mailto:terri.ellis@unf.edu)

17

## 18 **Abstract**

19           Bacterial exposure to antibiotic concentrations below the minimum inhibitory  
20 concentration (MIC) may result in a selection window allowing for the rapid evolution of  
21 resistance. These sub-MIC concentrations are commonly found in the greater environment. This  
22 study aimed to evaluate the adaptive genetic changes in *Klebsiella pneumoniae* 43816 after  
23 prolonged but increasing sub-MIC levels of the common antibiotic cephalothin over a fourteen-  
24 day period. Over the course of the experiment, antibiotic concentrations increased from 0.5  
25  $\mu\text{g/mL}$  to 7.5  $\mu\text{g/mL}$ . At the end of this extended exposure, the final adapted bacterial culture  
26 exhibited clinical resistance to both cephalothin and tetracycline, altered cellular and colony  
27 morphology, and a highly mucoid phenotype. Cephalothin resistance exceeded 125  $\mu\text{g/mL}$   
28 without the acquisition of beta-lactamase genes. Whole genome sequencing identified a series of  
29 genetic changes that could be mapped over the fourteen-day exposure period to the onset of  
30 antibiotic resistance. Specifically, mutations in the *rpoB* subunit of RNA Polymerase, the  
31 *tetR/acrR* regulator, and the *wcaJ* sugar transferase each fix at specific timepoints in the  
32 exposure regimen where the MIC susceptibility dramatically increases. These mutations indicate  
33 that alterations in the secretion of colanic acid and attachment of colonic acid to LPS, may  
34 contribute to the resistant phenotype. These data demonstrate that very low, sub-MIC  
35 concentrations of antibiotics can have dramatic impacts on the bacterial evolution of resistance.  
36 Additionally, this study demonstrates that beta-lactam resistance can be achieved through  
37 sequential accumulation of specific mutations without the acquisition of a beta-lactamase gene.

38

39           **Importance:** Bacteria are constantly exposed to low levels of antibiotics in the  
40 environment. The impact of this low-level exposure on bacterial evolution is not well  
41 understood. In this work, we developed a model to expose *Klebsiella pneumoniae* to progressive,  
42 low doses of the antibiotic cephalothin. After a fourteen-day exposure regimen, our culture  
43 exhibited full clinical resistance to this antibiotic without the traditional acquisition of  
44 inactivating genes. This culture also exhibited resistance to tetracycline, had a highly mucoid  
45 appearance, and exhibited altered, elongated cellular morphology. Whole genome sequencing  
46 identified a collection of mutations to the bacterial genome that could be mapped to the  
47 emergence of the resistant phenotype. This study demonstrates that antibiotic resistance can be  
48 achieved in response to low level antibiotic exposure and without the traditional acquisition of  
49 resistance genes. Further, this study identifies new genes that may play a role in the evolution of  
50 antibiotic resistant bacteria.

51

52   **Keywords:** *Klebsiella pneumoniae*, antibiotic resistance, selection window, capsule, beta-  
53 lactams

## 54 **Introduction**

55           The mis- and overuse of antibiotics by the medical and agricultural industries has created  
56 a basal level of antibiotic exposure present in our environment (1–5). Antibiotics may be  
57 introduced into the environment via three major pathways. The first is from urine and excretions  
58 of people, pets, and livestock. Between 40-90% of administered antibiotics are excreted through  
59 urine and feces with the molecule still in its active form (1). Second, antibiotics such as  
60 chlorhexidine are used in commercial agriculture and aquaculture (3). These substances can then  
61 contaminate nearby lands via wastewater and groundwater seepage (1, 6). Finally, antibiotics can  
62 enter the local environment through improper disposal of unused or expired prescriptions (1, 3).  
63 While concentrations of antimicrobial substances in the environment will vary based on location  
64 and potential sources of contamination, it is generally agreed that the residual environmental  
65 antibiotic concentration is not high enough to eradicate native bacterial populations. However,  
66 even at low concentrations these compounds become a source of survival stress for bacteria in the  
67 soil and water supplies. Concentrations below the bacteriostatic limit, referred to as sub-MIC  
68 levels, may result in the creation of a selection window for bacteria (7–9). This window is the  
69 concentration at which the occurrence of genomic mutations is highest and can lead to the  
70 development of clinical antibiotic resistance in pathogens.

71           Experiments have shown that sub-MIC antibiotic treatment can alter the resistance profile,  
72 nutrient use, protein expression, gene transcription and mutation rates among ESKAPE pathogens  
73 (4, 10, 11). However, current studies of sub-MIC exposure and bacterial adaptation have a number  
74 of limitations. First, these experiments frequently utilize strains of bacteria either known to harbor  
75 antibiotic resistance genes or are otherwise clinically resistant to one specific class of antibiotic.  
76 Second, the experimental designs include only brief exposure times to antibiotics. In most studies,

77 the samples were exposed to the antibiotic for only 24-48 hours, providing limited time for the  
78 bacteria to evolve novel genetic changes like those seen in a clinical or environmental setting  
79 where antibiotic exposure is both consistent and long term. Finally, genetic analyses frequently  
80 used pre-determined targets, or the phenotypes assumed from mutations in predetermined targets.  
81 While the results of these studies are informative, they are not comparable to situations in which  
82 antibiotic resistance phenotypes evolve over time through prolonged sub-lethal antibiotic exposure.

83 In this study, we utilized *Klebsiella pneumoniae* 43816, which does not exhibit clinical  
84 resistance to the major antibiotic classes. Bacterial cells were cultured using a progressive  
85 exposure method to gradually increasing sub-MIC concentrations of the beta-lactam antibiotic  
86 cephalothin over a fourteen day period. At the end of this prolonged exposure period to sub-MIC  
87 concentrations the bacteria exhibited clinical resistance to both cephalothin and tetracycline,  
88 altered cellular and colony morphology, and a highly mucoid phenotype. Whole genome  
89 sequencing identified a series of genetic changes that could be mapped over the fourteen-day  
90 exposure period to the onset of antibiotic resistance. Specifically, mutations in the *rpoB* subunit  
91 of RNA Polymerase, the *tetR/acrR* regulator, and the *wcaJ* sugar transferase each fix at specific  
92 points in the exposure regimen where the MIC susceptibility dramatically increases. These  
93 mutations indicate that secretion and export of colanic acid, and its association to  
94 lipopolysaccharides, may contribute to the resistant phenotype. These data demonstrate that very  
95 low, sub-MIC concentrations of antibiotics can have dramatic impacts on the bacterial evolution  
96 of resistance. Additionally, this study demonstrates that antibiotic resistance can be achieved  
97 through accumulation of mutations without the traditional acquisitions of beta-lactamase or other  
98 drug inactivating genes.

99

## 100 **Materials and Methods**

### 101 **Bacterial Strains and Progressive Antibiotic Exposure**

102 *Klebsiella pneumoniae* 43816 (ATCC, Manassas, VA) was used as the starting culture for  
103 the progressive antibiotic exposure experiment (Figure 1). All cultures were grown in Luria-  
104 Bertani (LB) broth (BD Difco, Franklin Lakes, NJ) at 37°C with shaking at 200 rpm. All  
105 antibiotics and reagents are from Thermo Fisher Scientific (Waltham, MA) unless otherwise  
106 indicated. *K. pneumoniae* was grown overnight from frozen stocks and 50 µL of this culture was  
107 added to 5 mL of fresh LB with 0.5 µg/mL cephalothin added. The concentration of 0.5 µg/mL  
108 cephalothin was significantly below the MIC for this organism. Cultures were grown for 12  
109 hours, at which point 50 µL were transferred to 5 ml of fresh LB with the same concentration of  
110 cephalothin. After a total of 24 hours exposure to one dose of antibiotics, 50 µL of culture were  
111 transferred to a new 5 mL of LB with a higher concentration of cephalothin. Each stepwise  
112 exposure increased the dose of cephalothin by 0.5 µg/mL, to a final dose of 7.5 µg/mL  
113 cephalothin. An untreated culture of *K. pneumoniae* 43816 was grown in parallel without the  
114 addition of antibiotic. Frozen glycerol stocks were made of each culture at each 12-hour transfer  
115 point for later analysis.

### 116 **Bacterial Growth and Morphology**

117 At the 12-hour timepoint in each exposure, the bacteria were transferred to fresh LB with  
118 antibiotic. At this point, the time required for the bacterial culture to reach an OD600 of 1.0 was  
119 determined using an Eppendorf Biophotometer (Hamburg, Germany). Growth curves were  
120 generated for the original, untreated fourteen-day culture and antibiotic adapted strain from  
121 frozen stocks. Frozen stocks were grown overnight in LB and then 50 uL were transferred to

122 fresh LB. 7.5  $\mu\text{g}/\text{mL}$  of cephalothin was added to all adapted culture media. Growth was  
123 determined at  $\text{OD}_{600}$  every 30 minutes using the Eppendorf Biophotometer.

124 Changes in colony morphology were determined by quadrant streaking on LB agar  
125 plates. To determine cellular morphology, overnight bacterial cultures were centrifuged at 5,000  
126 rpm for 5 minutes and re-suspended in phosphate-buffered saline (PBS) (pH 8.0). Samples were  
127 then diluted in PBS to an optical density of approximately 1.0  $\text{OD}_{600}$ . Cells were negative stained  
128 with 1% Nigrosin and visualized by brightfield microscopy at 1,000X with an oil immersion  
129 lens.

### 130 **Determination of MIC<sub>50</sub>**

131 Broth microdilution assays were used to determine the minimum inhibitory concentration  
132 (MIC) of cephalothin, tetracycline, and amikacin. 96 well plates were seeded with LB broth  
133 containing  $10^3$  CFU/mL starting concentration. Antibiotics were added in a two- fold serial  
134 dilution starting at 500  $\mu\text{g}/\text{mL}$ . Cultures were incubated overnight, and growth was measured at  
135  $\text{OD}_{600}$  using a Biotek Gen5 plate reader (Winooski, VT). Wells containing only LB and bacteria  
136 were used as controls for normal growth. MIC<sub>50</sub> was determined as the lowest antibiotic  
137 concentration at which 50% of the untreated sample optical density was observed. All samples  
138 were tested in triplicate.

### 139 **Genomic DNA Isolation**

140 Genomic DNA was extracted using a protocol modified from Wright et. al. (12). Briefly,  
141 50 mL of overnight culture was pelleted for 10 minutes at 10,000 rpm at 4°C. The pellet was  
142 washed twice with TE25S buffer (25 mM Tris-HCl, 25 mM EDTA, 0.3 M sucrose, pH 8.0) and  
143 resuspended in TE25S with 10 mg/mL lysozyme and RNase. The mixture was incubated for two

144 hours at 37°C with shaking at 150 rpm. Proteinase K and 10% SDS were added and incorporated  
145 by inversion and incubated for 1-2 hours at 50-55°C with periodic inversions. 5M NaCl was  
146 added followed by 3.25 mL of CTAB (Cetyl Trimethyl Ammonium Bromide)/NaCl. The  
147 solution was mixed by inversion and incubated at 55°C for 10 minutes. A 24:1  
148 chloroform/isoamyl alcohol solution was added and incubated at room temperature with shaking  
149 at 100 rpm for 20 minutes. After incubation, the solution was centrifuged at 10,000 rpm and 4°C  
150 for 15 minutes, and the upper aqueous layers were transferred into fresh tubes. This chloroform  
151 treatment was repeated a second time. The upper aqueous layers of both samples were combined  
152 and an isopropyl alcohol volume of 0.6 of the collected sample was added and the mixture was  
153 gently inverted. After five minutes, the purified DNA was spooled from the tube onto a sterile  
154 Pasteur pipette. The spooled DNA was washed with approximately 5 mL of 70% ethanol and  
155 dried before being suspended in 300µL of EB buffer (QIAGEN, Hilden, Germany). Purified  
156 DNA was quantified by Qubit (ThermoFisher).

## 157 **Genome Sequencing**

158 Endpoint samples of DNA from *K. pneumoniae* 43816, the fourteen-day antibiotic  
159 adapted culture, and the fourteen-day untreated population were analyzed using SMRT Cell  
160 Sequencing by the National Center for Genome Resources ([www.ncgr.org](http://www.ncgr.org)). Samples were  
161 compared against the published reference sequence NZ\_CP009208.1 for *K. pneumoniae* 43816  
162 (13). Genetic variation between genomes was calculated using a modified form of  $F_{ST}$  or analysis  
163 of variance referred to as  $\Theta$  (14).  $F_{ST}$  values are evaluated against the null hypothesis that the  
164 populations are not genetically unique (14). Pacific Biosciences calculated allele frequencies and  
165 utilized a proprietary Quiver Algorithm to maximize accuracy in sequence reads using variation  
166 between the published genome and prior records.



167 A secondary round of sequencing detailed the complete sequence of samples from days  
168 1-14 of the adaptation experiment, the small colony forming variant, the large colony forming  
169 variant, and the day 14 adapted strain of *K. pneumoniae*. These DNA samples were analyzed by  
170 the Microbial Genome Sequencing Center (<https://www.migscenter.com>) which utilized an  
171 Illumina sequencing technique similar to that used by Baym *et. al.* (15). Any variations were  
172 analyzed using a proprietary breseq variant calling algorithm (16).

### 173 **Capsule Extraction and Characterization**

174 Capsular polysaccharide (CPS) was extracted using the protocol outlined by Domineco *et*  
175 *al.* (17). Briefly, 500  $\mu$ L of an overnight culture were mixed with 100  $\mu$ L of 1% Zwittergent 3-14  
176 in 100 mM citric acid, pH 2.0. The mixture was vortexed vigorously, incubated at 50°C for 20  
177 minutes, and centrifuged for 5 minutes at 14,000 rpm. The supernatant was then transferred to a  
178 fresh tube, mixed with 1.2 mL of absolute ethanol, and incubated for 90 minutes at 4°C. Precipitate  
179 was collected after centrifugation at 14,000 rpm for 10 minutes and dissolved in 200 $\mu$ L DI water.

180 CPS was quantified following a previously established protocol by Lin *et al.*(18).

181 Purified CPS was vortexed vigorously with 1.2mL of 12.5mM sodium tetraborate in  
182 concentrated sulfuric acid and heated for 5 minutes at 95°C. The samples were cooled before the  
183 addition of 20 $\mu$ L of 0.15% m-hydroxydiphenyl; and the absorbance was measured at 540 nm. A  
184 standard curve was generated using D-glucuronic acid to determine the concentration of  
185 glucuronic acid in the CPS samples. To ensure quantification of CPS from the same number of  
186 bacteria, strains were normalized to 10<sup>8</sup> CFUs/mL. Each assay was performed in triplicate from  
187 six individual cultures.

188 The carbohydrate composition of the CPS was characterized by GC-MS as previously  
189 detailed in Brunson et al (19). Briefly, CPS was purified from LPS using sodium deoxycholate at

190 a final concentration of 6 mM as described by Kachlany et al. (20). The CPS was pelleted with  
191 cold ethanol, then freeze-dried before being hydrolyzed in 0.5 M HCl at 85°C for 18 h. The  
192 hydrolyzed carbohydrates were modified with the Tri-Sil HTP reagent (Thermo Scientific,  
193 Waltham MA.), as described by York et al. (21). The modified carbohydrates were dried and  
194 resuspended in 1 ml hexane. The carbohydrate suspension in hexane was centrifuged at 1000 x g  
195 for 5 minutes and the supernatant was collected for GC-MS analysis.

196 GC-MS analyses were conducted with a CP-3800 GC (Varian, Palo Alto, CA.) using a  
197 Supelco SPB-608 30-m fused silica capillary column, containing a bonded stationary phase (0.25  
198 µm film thickness). The TMS (tri-methyl silyl) conjugated glycans were analyzed using the  
199 electron ionization mode with a Saturn 2200 GC/MS (Varian, Palo Alto, CA.). The initial oven  
200 temperature was 80 °C, held for 2 min. Then, the temperature was raised by 20°C/min and held  
201 at 160°C for 12 min. Finally, the oven temperature was raised by 20°C/min and held at 260°C for  
202 7 min.

### 203 **Quantification of Lipopolysaccharide:**

204 Whole cell lipopolysaccharide levels were quantified using the Purpald assay (22, 23).  
205 Briefly stated, cultures were centrifuged at 5,000 rpm for 5 minutes and re-suspended in PBS. 50  
206 µL of this cell solution was treated with 32 mM sodium periodate solution in a 96-well plate and  
207 incubated at room temperature for 25 minutes. After this incubation period, a 136 mM purpald  
208 solution in 2N NaOH was added, and the plate was incubated for an additional 20 minutes.  
209 Following the completion of this step, 64 mM sodium periodate solution was added, and the  
210 plate was incubated for 20 minutes. Absorbance was immediately determined at 540 nm and  
211 compared to a standard curve of pure lipopolysaccharide isolated from *K. pneumoniae* (Sigma).

212 St. Louis MO.). This assay was also used for capsule extracted as described above for the  
213 glucuronic acid assay. Results are presented with LPS concentrations normalized to  $10^8$  CFUs.

## 214 **Results**

### 215 **Experimental design of progressive sub-MIC exposure to cephalothin**

216 This study aimed to evaluate the adaptive genetic changes in *Klebsiella pneumoniae*  
217 43816 upon prolonged but increasing exposure to sub-MIC levels of the common antibiotic  
218 cephalothin. *Klebsiella pneumoniae* 43816 was utilized because *Klebsiella* is known for its  
219 genomic plasticity and rapid evolution of antibiotic resistance (24, 25). Additionally, the genome  
220 of this strain has been sequenced (13), allowing for tracking of genetic changes over the course  
221 of the progressive exposure.

222 The experimental design of this exposure protocol is diagramed in Figure 1. Fresh LB  
223 cultures were grown at 37C with shaking and an initial cephalothin concentration of 0.5 µg/mL.  
224 After the first 12 hours of culture, a sample was transferred to fresh LB with the same antibiotic  
225 concentration and allowed to grow for a second 12-hour period. Therefore, the bacteria were  
226 exposed to any one dose of antibiotics for 24 hours in total; at which point a sample was  
227 transferred to a culture with an increased concentration of antibiotic. At each step, the antibiotic  
228 concentration was increased by 0.5 µg/mL, up to a final exposure of 7.5 µg/mL, well below the  
229 CLSI standard for antibiotic resistance which is set at 16 µg/mL (26). As a control, an untreated  
230 culture, without antibiotics, was grown in parallel. Frozen stocks were made of all cultures at  
231 each 12-hour timepoint and saved for later analysis.

### 232 **Progressive antibiotic exposure alters *K. pneumoniae* growth and cellular and colony** 233 **morphology**

234 In order to evaluate the impact of such low antibiotic concentrations, we measured the  
235 rate of growth of the culture at the 12-hour transfer mark. As seen in Figure 2A, the antibiotic

236 exposed culture exhibited a greatly reduced growth rate (time to OD 1.0), indicative of a high  
237 stress level. The growth rate of the treated culture slowed greatly once antibiotic concentrations  
238 exceeded 4.5  $\mu\text{g}/\text{mL}$ ; while the growth rate of the untreated culture was not significantly affected  
239 over the course of the experiment (Figure 2A). The final adapted culture was able to grow  
240 rapidly in 7.5  $\mu\text{g}/\text{mL}$  cephalothin and the growth rate of this fully adapted culture was not found  
241 to be significantly different from either the originating culture or the untreated culture after  
242 fourteen days of continuous growth in LB (Figure 2B).

243 While the growth rates remained similar, the appearance of the antibiotic treated culture  
244 was significantly altered after the progressive exposure experiment. The antibiotic adapted  
245 culture exhibited a highly mucoid appearance in liquid culture compared to the clonally related  
246 untreated group (Figure 3A). While the viscosity changed, the adapted population did not qualify  
247 as a hypermucoviscous strain as indicated by a string test (data not shown).

248 Differences were also observed in cellular and colony morphology. The antibiotic  
249 exposed culture resulted in cells with a greatly elongated, filamentous structure (Figures 3B and  
250 3C). Further plating of the final antibiotic adapted culture resulted in two consistent colony  
251 morphologies (Figure 3D), designated small and large colonies. When each colony morphology  
252 was isolated, grown in liquid culture and then replated, each of these morphologies consistently  
253 reproduced only either the small or large phenotype (data not shown). The fact that colony size  
254 was maintained after isolation indicated that the morphological change was heritable.

### 255 **Progressive antibiotic exposure induces clinical resistance to multiple classes of antibiotics**

256 Changes in the minimum inhibitory concentration (MIC) of several different classes of  
257 antibiotic were determined by the broth microdilution assay. The concentration of antibiotic

258 necessary to depress bacterial growth by half, also called the MIC50, was found to be a more  
259 sensitive measure in detecting changes in resistance. As seen in Table 1, the fourteen-day growth  
260 period of untreated cells did not greatly impact the MIC50 values against any antibiotic tested.  
261 At the end of the fourteen-day progressive antibiotic exposure, the adapted culture exhibited  
262 extremely high MIC50 values to cephalothin, indicative of full clinical resistance. However, that  
263 the bacteria were only directly exposed to 7.5 µg/mL of cephalothin, which is approximately half  
264 the traditional MIC cutoff concentration (26).

265 To more fully evaluate the impact of progressive sub-MIC cephalothin exposure on the  
266 bacteria, antibiotics utilizing different cellular targets were also tested for changes in MIC50.  
267 Progressive exposure had little impact on the MIC50 value for the aminoglycoside antibiotic  
268 amikacin, but it did induce clinical resistance to tetracycline.

269 Additionally, MIC50s were determined for the two isolated colony morphologies from  
270 the final antibiotic adapted culture. Both the small and large morphologies exhibited clinical  
271 resistance to cephalothin, with the large colonies exhibiting extreme MICs above that of either  
272 the small or the adapted final culture. Both isolates also exhibited elevated MIC50 to  
273 tetracycline; but were more sensitive than the mixed final adapted culture. Amikacin MICs were  
274 not significantly changed in either phenotype. These data demonstrate that progressive sub-MIC  
275 concentrations of a single antibiotic provide sufficient evolutionary pressure to drive the  
276 evolution of clinical levels of resistance to multiple classes of antibiotics.

277 **Whole genome sequencing reveals distinctive genetic changes because of progressive**  
278 **antibiotic exposure**

279 To determine the genetic changes responsible for this antibiotic resistant mucoid  
280 phenotype, DNA from the fourteen-day untreated and final adapted cultures of *K. pneumoniae*  
281 43816 was sequenced by the National Center for Genome Resources using a SMRT Cell  
282 methodology. The initial sequence data identified 107 mutations in the control culture and 29  
283 mutations in the genome of the resistant culture (Figure 4). Of the 29 mutations identified in the  
284 adapted strain, 15 were nonsynonymous changes that occurred in protein-coding regions of the  
285 sequence. To further refine the list of potential targets, any mutations shared with the untreated  
286 population of bacteria were removed. Comparing the two genomes highlighted seven protein  
287 coding genes which were altered in the final antibiotic adapted cells (Table 2). Notably, none of  
288 these were identified as penicillin binding proteins or other cell wall modification genes highly  
289 associated with traditional beta-lactam resistance.

290 The only mutations that were not 100% fixed in the population at the conclusion of the  
291 fourteen-day progressive exposure were nucleotide substitutions in the coding region of the  
292 SGNH/GDSL hydrolase family protein and a deletion in the promoter of SGNH/GDSL (Table  
293 2). This may be linked to the emergence of the small and large colony variants. Other genetic  
294 changes that were fixed by the 14-day endpoint include deletions in the coding regions of the  
295 following: N-acetyltransferase, ABC transporter, ATP binding protein, and DNA recombination  
296 protein (RmuC). Additionally, a substitution in the coding region of undecaprenyl-phosphate  
297 glucose phosphotransferase was discovered. An insertion was found in a globin coding sequence  
298 and a large insert in the *tetR/acrR* transcriptional regulator resulted in an early stop codon. The  
299 functions of these genes encompassed cellular processes of signal transduction, energy and  
300 metabolite use, capsule formation, and nucleic acid proofreading.

301 In addition to changes in the coding regions of those genes, six unique mutations were  
302 identified in promoter regions of five other genes that were fixed in the adapted population  
303 (Table 2). Promoter regions were defined as occurring within 150 bp of a protein coding start  
304 site. Synonymous mutations between the untreated and adapted cultures were removed as  
305 described above. With exception to SGNH/GDSL, all other genetic changes in promoter regions  
306 were fully fixed in 100% of the DNA sampled. Not all genes associated with these promoters  
307 have been fully characterized in *Klebsiella pneumoniae*. In those cases, the data about the class  
308 of each gene and close homologues is presented. Functions of the coding regions encompassed  
309 cell metabolism, signal transduction, and mRNA proofreading.

### 310 **Genome sequencing allows for correlation of genetic changes and increased MICs**

311 To establish connections between phenotypic and genotypic changes over the course of  
312 the fourteen-day experiment, DNA was extracted from bacterial stocks of each day of the  
313 progressive antibiotic exposure and sequenced by the Microbial Genome Sequencing Center  
314 using an Illumina sequencing method and a proprietary statistical algorithm for variant calling.  
315 This methodology identified far fewer mutations than the first round of sequencing, in part  
316 because it does not analyze changes to non-coding regions of the genome, such as promoters.

317 Changes to *rpoB*, *tetR/acrR*, *wcaJ*, and *gndA* were identified using both sequencing  
318 methodologies (Table 3). The timepoint of 100% fixation of these changes within the bacterial  
319 population could then be mapped to the timeline of changes in growth rate and increases in  
320 antibiotic MIC50s. As seen in Figure 5, the emergence of clinical tetracycline resistance can be  
321 paired with fully fixed alterations in *rpoB*, and large increases in the cephalothin MICs can be  
322 correlated with fixed changes to *tetR/acrR*, and *wcaJ*. The large increase in cephalothin MIC  
323 associated with *wcaJ* can also be mapped to the decreased growth rate seen in Figure 2A.



324 Two separate sets of sequence changes in *wcaJ*, and *gndA* were identified using the  
325 Illumina methodology (Table 3). The final adapted culture, which is composed of a mix of large  
326 and small colony morphologies, identified sequence changes with only 64% genome coverage.  
327 When the two morphologies were sequenced separately, a large deletion that impacted both  
328 genes was found in only the small colony variant.

329 Both the large and small colony variants had mutations in the *rpoB* and *tetR/acrR*  
330 transcriptional regulator sequences. The mutation in *rpoB* was 100% fixed in both variants.  
331 However, the depth of coverage of the *tetR/acrR* transcriptional regulator in the large colony  
332 variant was only 52%. The large colony variant also had a distinguishing marginal mutation call  
333 in a *comEC* family protein that was not found in the small colony variant. The small colony  
334 variant exhibited an additional SNP in a *yfiR* family protein that was not identified in the large  
335 colony variant. All of the mutations in the small colony forming variant were 100% fixed  
336 indicating a more homogenous genomic identity than the large colony forming subpopulation.

337 **Genetic changes in progressive antibiotic adapted cultures are associated with alterations**  
338 **to capsule and LPS**

339 The final adapted culture from this progressive antibiotic exposure experiment exhibited  
340 a highly mucoid phenotype indicating that capsule production or composition may be altered.  
341 Genome sequencing then identified alterations to *wcaJ*, which is part of the capsule *cps* operon  
342 and initiates production of colanic acid (27). Therefore, we hypothesized that alterations to  
343 capsule production and composition may be directly related to the emergence of high  
344 concentration cephalothin resistance.

345 To investigate changes in the capsule, extracellular polysaccharide was extracted and  
346 quantified by the uronic acid assay. As can be seen in Figure 6A, capsule polysaccharide  
347 increases until the fixation of the *tetR/acrR* mutation and emergence of clinical cephalothin  
348 resistance. All samples after this point exhibited capsule polysaccharides at levels similar to or  
349 below that seen produced by the untreated control culture.

350 Given that the uronic acid assay only detects one sugar moiety within the capsule  
351 polysaccharide, other possible components of the capsule were investigated. Extracted capsule  
352 from untreated and adapted cultures were found to contain similar levels of sialic acids, which is  
353 associated with increased virulence (28) (data not shown). Adapted capsule extracts exhibited  
354 reduced total protein content as determined by BCA assay (data not shown); but did have  
355 elevated LPS content (Figure 6B). This elevated LPS content was found in both whole cells as  
356 well as extracted capsule, indicating high level of outer membrane turnover in the adapted  
357 culture. Finally, capsule extract was analyzed by GC/MS to identify new peaks indicative of  
358 changes to the sugar composition (Figure 6C). No new peaks were identified indicating that  
359 novel carbohydrate changes are not directly associated with the antibiotic resistant phenotype.

360

361

## 362 Discussion

363 The goal of this study was to characterize the impact of low concentration antibiotic  
364 exposure on the evolution of bacterial resistance. A progressive exposure model was used, in  
365 which *Klebsiella pneumoniae* was exposed to slowly increasing sub-MIC concentrations of the  
366 antibiotic cephalothin. The final resulting culture had been exposed to a maximum antibiotic  
367 concentration of 7.5 µg/mL cephalothin. This final culture exhibited full and extreme clinical  
368 resistance to the beta-lactam cephalothin, with MIC values over 125 µg/mL, increased MICs to  
369 tetracycline, a highly mucoid appearance, and an elongated cellular morphology. Genome  
370 sequencing revealed a series of genetic alterations that could be mapped directly to the  
371 emergence of the resistant phenotype. Changes in phenotype and genetic alterations both indicate  
372 that alterations in the *tetR* regulator, LPS shedding, and capsule colanic acid synthesis may be  
373 directly associated with the resistance phenotype.

374 The three resistance-correlated mutations occurred in genes *rpoB*, *tetR/acrR*, and *wcaJ*.  
375 The increases in resistance occurred in a stepwise manner, similar to the increases in fitness  
376 observed in *E. coli* long-term evolution (LTEE) experiments (29–31). LTEE studies also  
377 provided estimates for the rapidity of mutation fixation in a constant environment. The *E. coli*  
378 population in the LTEE experiments accumulated 20 mutations in the first 10,000 generations of  
379 growth with a few rapid mutations that reached fixation in the population within 100 generations  
380 (30, 31). The three resistance-correlated mutations in this present study all fixed within 36-378.9  
381 generations using a generation time estimate from a related *K. pneumoniae* strain of 38-40  
382 minutes (32). While the present study does use incremental changes in antibiotic concentration, it  
383 does not counteract that these mutations were acquired rapidly and indicates a fitness benefit to  
384 the adapted population.

385           The speed with which these three mutations were acquired also indicates that the sub-  
386 MIC concentration of cephalothin in the growth environment provides significant selective  
387 pressure. After only 24 hours of exposure, the resistance of the adapted population to tetracycline  
388 had the first jump from 1  $\mu\text{g}/\text{mL}$  to 8  $\mu\text{g}/\text{mL}$ , which correlated with a fixed mutation in *rpoB*.  
389 The rapidity of fixation and correlated increase in survivability suggest that this mutation  
390 conferred a very high fitness advantage. It is possible that a necessary step in acquiring resistance  
391 for this population was mutation in a gene meant to monitor nucleic acid integrity, allowing for  
392 further alterations to the genome.

393           The selection window hypothesis holds that sub-MIC level antibiotic exposure should  
394 generally increase bacterial mutation rates (7, 8) because higher mutation rates will improve the  
395 chances of generating an adaptive genetic change that provides a fitness advantage in conditions  
396 of antibiotic stress. Methodologies employed by studies testing this theory have generally  
397 identified “mutants” by plating samples of a bacteria exposed to an antibiotic on media  
398 inoculated with some other antibiotic substance (4, 9). Mutation rates analyzed using this  
399 methodology tend to indicate that lower antibiotic concentrations result in high mutation rates  
400 that decline as the concentration of antibiotic nears the MIC (9, 33). However, when whole-  
401 genome analysis is incorporated along with mutation accumulation analysis, substitutions and  
402 insertions/deletions increased in frequency as exposure to antibiotic increased in *E.coli* (34).  
403 Additionally, the rate of mutation in known resistance genes tracked in *P. aeruginosa* isolates  
404 exposed to antibiotics and generated conflicting results (11).

405           The present study utilized whole genome sequencing to identify mutations across the  
406 genome for the antibiotic-treated and unexposed sample after 14 days of total treatment. The data  
407 from SMRT cell sequencing shows a higher number of mutations in the untreated sample

408 compared to the adapted cohort. As noted by Long et. al., a true mutation accumulation analysis  
409 that determines the frequency of genetic polymorphism per generation would require repeatedly  
410 passing a bacteria through bottlenecks to mitigate any selective influences (34). The fact that the  
411 adapted population in this study was maintained as a whole group when sub-cultured may affect  
412 the relative number of mutations identified by whole genome sequencing. Another factor at work  
413 is that the treatment concentration of cephalothin did surpass the initial MIC of *K. pneumoniae*  
414 43816 for over half of the adaptation period (Table 1). Both the selection window hypothesis and  
415 adaptive studies of bacterial mutation would suggest that such a high concentration would  
416 decrease mutation rates compared to an unexposed cohort and explain the low number of  
417 identified polymorphisms (4, 7–9, 33).

418         The *rpoB* mutation identified by Illumina sequencing early in the exposure regimen is  
419 very close to an alteration detected in the *rmuC* DNA recombination protein in the final sample  
420 sequenced using the SMRT cell method. The mutations identified do not all match between both  
421 sequencing methods, nor are the calls for similar genes found in the exact same position or using  
422 the same base changes (Table 4 A and B, Table 5 A-C). This could reflect differences in  
423 methodology, genome construction in the two methods, and/or inherent error.

424         The protein products of both *rpoB* and *rmuC* interact closely with genomic DNA. RmuC  
425 is a regulator which can prevent sequence inversion during replication (35). RmuC has also been  
426 identified as a possible multidrug resistance (MDR) gene in other Gram-negative bacterial  
427 species (36, 37). However, RpoB is part of the RNA polymerase protein complex and when  
428 mutated can inhibit the action of rifamycin in bacteria (38). Mutations in *rpoB* have been linked  
429 to rifamycin resistance in *E. coli* (39, 40), and has been identified as a resistance gene in various  
430 other classes of bacteria (41). Additionally, the fact that the mutation in a gene tied to nucleic

431 acid integrity occurs first provides a possible mechanism for further evolution of resistance by  
432 increasing the occurrence of replication error mutations in progeny.

433 TetR regulators are global multi-target transcriptional regulators that affect multiple  
434 processes within the cell beyond just efflux pumps (43, 44). Members of this family of regulatory  
435 proteins have been show to impact a variety of virulence associated targets including motility,  
436 biofilm formation, and osmotic tolerance (42). One member of this family has been directly  
437 associated with *ftsZ*, which is known to regulate cell division and bacillus cellular morphology  
438 (43). Therefore, it is reasonable for a mutation in a *tetR* type regulator to impact cellular functions  
439 and resistance to classes of antibiotics other than tetracycline.

440 It is interesting that such a large insert and formation of a stop codon would be found in a  
441 gene known for resistance to tetracyclines when the adapted population of this study was exposed  
442 to a beta-lactam. The development of cross resistance among bacterial populations exposed to one  
443 class of antibiotic is not uncommon. Exposure to environmental chemicals such as surface  
444 antiseptic chlorhexidine, or veterinary antibiotics tilmicosin and florfenicol have been shown to  
445 create cross-resistance in human pathogens to different classes of antibiotics (3, 5).

446 The genetic alterations associated with the largest increase in beta-lactam resistance were  
447 mapped to two adjacent genomic locations. The SMRT method identified an uncharacterized  
448 undecaprenyl phosphate-glucose phosphotransferase, which is very close to the mutation found  
449 in *wcaJ* by Illumina sequencing (Table 2, Table 3). The second round of sequencing specified  
450 that there was a large deletion encompassing the end of the *wcaJ* and beginning of the *gndA*  
451 genes which was exclusive to the small colony forming subpopulation.

452 In *Klebsiella pneumoniae*, *wcaJ* is part of the capsular *cps* operon and initiates production  
453 of colanic acid (27, 44). Absence of *wcaJ* has been linked to increased resistance to phage  
454 treatment, decreased virulence in live murine models, and increased phagocytosis by  
455 macrophages (27). Studies ablating *wcaJ* in *Klebsiella pneumoniae* result in a nonmucoid  
456 phenotype while increasing biofilm production and increasing resistance to polymyxin (44).

457 Our observation of altered cellular morphology may be related to envelope stress and  
458 remodeling. Beta-lactam exposure has been previously documented to induce the formation of  
459 filamentous bacterial cells (45). Additionally, Kessler *et. al* demonstrated altered cell shape in  
460 *wcaJ* knockouts that exhibited accumulation of periplasmic colanic acid precursors and  
461 activation of the Rcs osmotic stress response pathway (46).

462 Colanic acid polymers can be covalently linked to lipopolysaccharides (47). We observed  
463 increased LPS content in our extracted capsule polysaccharides, indicating that the *wcaJ*  
464 mutation may trigger increased membrane turnover. The ability to synthesize LPS O-antigen  
465 sugars has been documented to directly impact colanic acid synthesis (48). It is therefore  
466 reasonable to hypothesize that alterations in *wcaJ*, may likewise impact LPS synthesis,  
467 modification, and turnover. Studies of more general osmotic stress indicate the possibility of a  
468 shift from O-antigen attachment to colanic acid attachment (47).

469 Together, these data indicate that low level beta-lactam exposure initiates a cascade of  
470 modifications to the outer envelope and capsule polysaccharides that warrants further  
471 investigation. Studies examining single knockouts of either *tetR* or *wcaJ* did not find associated  
472 changes in beta-lactam MICs (42)(46). Mutations in *rpoB* have been associated with beta-lactam  
473 resistance, but not resistance to multiple classes of antibiotics (49). It is therefore highly likely  
474 that a combination of multiple mutations is required to achieve a multi-drug resistant phenotype.

475           Our final adapted culture represented a heterogeneous mixture of two colony  
476 morphologies, which was reflected in the genome sequence analysis. The deletion spanning  
477 between *wcaJ* and *gndA* only occurred in the small colony forming population. As noted above,  
478 ablation of *wcaJ* in *K. pneumoniae* is linked to a decrease in species mucoidy and increased  
479 sensitivity to polymyxin. Similarly, *gndA* is a gene within the *cps* locus responsible for the K2  
480 serotype and capsule formation of *K. pneumoniae* (50, 51). It therefore seems likely that the  
481 mucoid phenotype seen in the fourteen day adapted population whole-group mixture is due to the  
482 large colony subpopulation only. This is supported by the fact that the small colony  
483 subpopulation has a reduced resistance to cephalothin compared to the large colonies which has  
484 an intact *wcaJ* sequence.

485           In summary, the progressive antibiotic exposure experiment resulted in a mixture of  
486 bacteria exhibiting multiple genomic changes. The multiple isolates from this experiment  
487 resulted in bacteria that were resistant, rather than tolerant of the antibiotic, as they exhibited  
488 normal metabolic activity and growth in the presence of the antibiotic (52). While both the large  
489 and small variants isolates exhibited elevated MICs to cephalothin, the mixture of these isolates  
490 demonstrated a synergistic protective effect. This mixture is reflective of what would occur in  
491 the environment, where individual cells may independently evolve, persist, or assist in the  
492 survival of nearby cells. The bacteria in this study achieved clinical resistance without the  
493 traditional acquisition of a beta-lactamase gene. These compensatory mutations, and  
494 combinations of them, warrant further investigation as they may accelerate and enhance  
495 resistance associated with traditional horizontal gene transfer.

496



497 **Funding and Acknowledgements**

498           This research was supported by funding from UNF to T.N.E., including a Dean's Council  
499 Fellowship Award, a Research Enhancement Plan Award, and the Transformational Learning  
500 Opportunity Program. We thank Frank Smith for assistance with bioinformatics software, and all  
501 members of the Ellis lab for thoughtful input and comments.

502

503 **Figure Legends:**

504 **Figure 1: Experimental design.** *Klebsiella pneumoniae* 43816 was exposed to increasing  
505 concentrations of cephalothin in LB media over a continuous 14-day period. Each single dose  
506 exposure lasted 24 hours and included a sub-culture into fresh media with antibiotics at the 12-  
507 hour mark. Frozen bacterial stocks were made every 12 hours for subsequent analysis. A control  
508 culture was also grown and sub-cultured in LB media without antibiotics for 14 days.

509

510 **Figure 2: Changes in growth properties as a result of low dose antibiotic exposure.** A)  
511 Measurement of time required for adapted and untreated *K. pneumoniae* 43816 sub-culture to  
512 reach an OD600 of 1.0 after 12-hour exposure to new antibiotic dose. B) Growth curves of  
513 original *K. pneumoniae* 43816, 14-day untreated, and 14-days adapted cultures.

514

515 **Figure 3: Changes in cell, liquid culture, and colony morphology as a result of antibiotic**  
516 **exposure.** A) Broth culture appearance of original stock and adapted culture after 14-day  
517 antibiotic exposure. Negative stain (1000x) of cell morphology of untreated culture (B) and  
518 adapted culture (C) showing elongated cell morphology. D) 14 day adapted culture on LB agar  
519 culture showing two different colony morphologies.

520

521 **Table 1: Changes in minimum inhibitory concentration (MIC) of *K. pneumoniae* 43816**  
522 **cultures after progressive low dose exposures.** Broth microdilution assays (n=5) determined  
523 the MIC 50% of three different antibiotics for endpoint cultures and endpoint colony  
524 morphology isolates. \* indicates values that exceed the CLSI breakpoint for clinical resistance  
525 (26).

526 **Figure 4: Genomic changes triggered by low dose cephalothin exposure.** Venn diagram of  
527 non-synonymous SNPs, insertions or deletions identified by SMRT Cell genomic sequencing of  
528 cultures growth for 14 days with or without low dose antibiotic exposure.

529

530 **Table 2: Non-synonymous single nucleotide polymorphisms and genomic changes identified**  
531 **in 14 Day adapted culture.** SMRT Cell genomic sequencing was used for whole genome  
532 sequencing. The genome sequence of *K. pneumoniae 43816* was used as the reference genome.

533

534 **Table 3: SNPs and genomic changes identified in large and small colony subpopulations of**  
535 **14 day adapted culture.** Illumina genomic sequencing was used for sequencing of colony  
536 subpopulations. The genome sequence of *K. pneumoniae 43816* was used as the reference  
537 genome.

538

539 **Figure 5: MIC breakpoints map to onset of clinical resistance and fixation of genomic**  
540 **changes.** Broth microdilution assays (n=3) determined MIC breakpoints of cultures over 14-day  
541 progressive exposure. Arrows indicate jumps above clinical resistance breakpoint and fixation of  
542 specific genetic changes as identified by Illumina whole genome sequencing.

543

544 **Figure 6: Onset of clinical resistance coincides with changes in quantity and composition of**  
545 **capsule and LPS on outer bacterial surface.** A) Total capsule production quantified by  
546 glucuronic acid over the course of 14-day progressive experiment. B) LPS content of whole cell  
547 or extracted bacterial capsule determined by the Purpald Assay. C) GC-MS analysis of the  
548 carbohydrate composition of capsules extracted from untreated and adapted cultures.

## 549 **References**

- 550 1. Polianciuc SI, Gurzău AE, Kiss B, Georgia Ștefan M, Loghin F. 2020. Antibiotics in the  
551 environment: causes and consequences. *Med Pharm Reports* 93.
- 552 2. 2015. National Action Plan to Combat Antibiotic-Resistant Bacteria.
- 553 3. Kampf G. 2016. Acquired resistance to chlorhexidine – is it time to establish an ‘antiseptic  
554 stewardship’ initiative? *J Hosp Infect.*
- 555 4. Nair CG, Chao C, Ryall B, Williams HD. 2013. Sub-lethal concentrations of antibiotics  
556 increase mutation frequency in the cystic fibrosis pathogen *Pseudomonas aeruginosa*. *Lett*  
557 *Appl Microbiol* 56.
- 558 5. Singh AK, Bhunia AK. 2019. Animal-Use Antibiotics Induce Cross-Resistance in  
559 Bacterial Pathogens to Human Therapeutic Antibiotics. *Curr Microbiol* 76.
- 560 6. Singer AC, Shaw H, Rhodes V, Hart A. 2016. Review of Antimicrobial Resistance in the  
561 Environment and Its Relevance to Environmental Regulators. *Front Microbiol* 0:1728.
- 562 7. Drlica K. 2003. The mutant selection window and antimicrobial resistance. *J Antimicrob*  
563 *Chemother.*
- 564 8. Drlica K, Zhao X. 2007. Mutant selection window hypothesis updated. *Clin Infect Dis.*
- 565 9. Gullberg E, Cao S, Berg OG, Ilbäck C, Sandegren L, Hughes D, Andersson DI. 2011.  
566 Selection of resistant bacteria at very low antibiotic concentrations. *PLoS Pathog* 7.
- 567 10. Low YM, Chong CW, Yap IKS, Chai LC, Clarke SC, Ponnampalavanar S, Abdul Jabar  
568 K, Md Yusof MY, Teh CSJ. 2018. Elucidating the survival and response of carbapenem  
569 resistant *Klebsiella pneumoniae* after exposure to imipenem at sub-lethal concentrations.

- 570 Pathog Glob Health 112.
- 571 11. Migliorini LB, Brüggemann H, De Sales RO, Koga PCM, De Souza AV, Martino MDV,  
572 Galhardo RS, Severino P. 2019. Mutagenesis induced by sub-lethal doses of  
573 ciprofloxacin: Genotypic and Phenotypic Differences between the *Pseudomonas*  
574 *aeruginosa* Strain PA14 and Clinical Isolates. *Front Microbiol* 10.
- 575 12. Wright MH, Adelskov J, Greene AC. 2017. Bacterial DNA Extraction Using Individual  
576 Enzymes and Phenol/Chloroform Separation. *J Microbiol Biol Educ* 18.
- 577 13. Broberg CA, Wu W, Cavalcoli JD, Miller VL, Bachman MA. 2014. Complete genome  
578 sequence of *Klebsiella pneumoniae* strain ATCC 43816 KPPR1, a rifampin-resistant  
579 mutant commonly used in animal, genetic, and molecular biology studies. *Genome*  
580 *Announc* 2.
- 581 14. Martin AP. 2002. Phylogenetic approaches for describing and comparing the diversity of  
582 microbial communities. *Appl Environ Microbiol*.
- 583 15. Baym M, Kryazhimskiy S, Lieberman TD, Chung H, Desai MM, Kishony RK. 2015.  
584 Inexpensive multiplexed library preparation for megabase-sized genomes. *PLoS One* 10.
- 585 16. Barrick JE. 2016. breseq Manual — breseq 0.35.2rc1 documentation.
- 586 17. Domenico P, Schwartz S, Cunha BA. 1989. Reduction of capsular polysaccharide  
587 production in *Klebsiella pneumoniae* by sodium salicylate. *Infect Immun* 57.
- 588 18. Lin TL, Yang FL, Yang AS, Peng HP, Li TL, Tsai MD, Wu SH, Wang JT. 2012. Amino  
589 Acid Substitutions of MagA in *Klebsiella pneumoniae* Affect the Biosynthesis of the  
590 Capsular Polysaccharide. *PLoS One* 7.

- 591 19. Brunson DN, Maldosevic E, Velez A, Figgins E, Ellis TN. 2019. Porin loss in *Klebsiella*  
592 *pneumoniae* clinical isolates impacts production of virulence factors and survival within  
593 macrophages. *Int J Med Microbiol* 309:213–224.
- 594 20. Kachlany SC, Lavery SB, Kim JS, Reuhs BL, Lion LW, Ghiorse WC. 2001. Structure and  
595 carbohydrate analysis of the exopolysaccharide capsule of *Pseudomonas putida* G7.  
596 *Environ Microbiol* 3.
- 597 21. York WS, Darvill AG, McNeil M, Stevenson TT, Albersheim P. 1986. Isolation and  
598 characterization of plant cell walls and cell wall components. *Methods Enzymol* 118.
- 599 22. Turner KL, Cahill BKBK, Dilello SKSK, Gutel D, Brunson DNDN, Alberti S, Ellis  
600 TNTN. 2015. Porin loss impacts the host inflammatory response to outer membrane  
601 vesicles of *Klebsiella pneumoniae*. *Antimicrob Agents Chemother* 60:1360–1369.
- 602 23. Velkov T, Soon RL, Chong PL, Huang JX, Cooper MA, Azad MAK, Baker MA,  
603 Thompson PE, Roberts K, Nation RL, Clements A, Strugnell RA, Li J. 2013. Molecular  
604 basis for the increased polymyxin susceptibility of *Klebsiella pneumoniae* strains with  
605 under-acylated lipid A. *Innate Immun* 19.
- 606 24. Paczosa MK, Meccas J. 2016. *Klebsiella pneumoniae*: Going on the Offense with a Strong  
607 Defense. *Microbiol Mol Biol Rev* 80.
- 608 25. Gomez-Simmonds A, Uhlemann AC. 2017. Clinical implications of genomic adaptation  
609 and evolution of carbapenem-resistant *klebsiella pneumoniae*. *J Infect Dis* 215.
- 610 26. Clinical and Laboratory Standards Institute. 2020. Clinical and Laboratory Standards  
611 Institute (CLSI). Performance Standards for Antimicrobial Susceptibility Testing. 30th

- 612 ed.CLSI supplement M100.
- 613 27. Cai R, Wang G, Le S, Wu M, Cheng M, Guo Z, Ji Y, Xi H, Zhao C, Wang X, Xue Y,  
614 Wang Z, Zhang H, Fu Y, Sun C, Feng X, Lei L, Yang Y, Ur Rahman S, Liu X, Han W,  
615 Gu J. 2019. Three capsular polysaccharide synthesis-related glucosyltransferases, GT-1,  
616 GT-2 and WcaJ, are associated with virulence and phage sensitivity of *Klebsiella*  
617 *pneumoniae*. *Front Microbiol* 10.
- 618 28. Lee CH, Chang CC, Liu JW, Chen RF, Yang KD. 2014. Sialic acid involved in  
619 hypermucoviscosity phenotype of *Klebsiella pneumoniae* and associated with resistance to  
620 neutrophil phagocytosis. *Virulence* 5.
- 621 29. Lenski RE. 2017. Experimental evolution and the dynamics of adaptation and genome  
622 evolution in microbial populations. *ISME J*.
- 623 30. Good BH, McDonald MJ, Barrick JE, Lenski RE, Desai MM. 2017. The dynamics of  
624 molecular evolution over 60,000 generations. *Nature* 551.
- 625 31. Kleinman A. 2019. Fixation and Adaptation in the Lenski *E. coli* Long Term Evolution  
626 Experiment. *Biomed J Sci Tech Res* 20.
- 627 32. Regué M, Hita B, Piqué N, Izquierdo L, Merino S, Fresno S, Benedí VJ, Tomás JM. 2004.  
628 A Gene, *uge*, Is Essential for *Klebsiella pneumoniae* Virulence. *Infect Immun* 72:54–61.
- 629 33. Martinez JL, Baquero F. 2000. Mutation frequencies and antibiotic resistance. *Antimicrob*  
630 *Agents Chemother*.
- 631 34. Long H, Miller SF, Strauss C, Zhao C, Cheng L, Ye Z, Griffin K, Te R, Lee H, Chen CC,  
632 Lynch M. 2016. Antibiotic treatment enhances the genome-wide mutation rate of target

- 633 cells. Proc Natl Acad Sci U S A 113.
- 634 35. Slupska MM, Chiang JH, Luther WM, Stewart JL, Amii L, Conrad A, Miller JH. 2000.  
635 Genes involved in the determination of the rate of inversions at short inverted repeats.  
636 Genes Cells 5:425–37.
- 637 36. Moskowitz SM, Ernst RK, Miller SI. 2004. PmrAB, a Two-Component Regulatory  
638 System of *Pseudomonas aeruginosa* that Modulates Resistance to Cationic Antimicrobial  
639 Peptides and Addition of Aminoarabinose to Lipid A. J Bacteriol 186.
- 640 37. Van Dyk TK, DeRose EJ, Gonye GE. 2001. LuxArray, a high-density, genomewide  
641 transcription analysis of *Escherichia coli* using bioluminescent reporter strains. J Bacteriol  
642 183.
- 643 38. Campbell EA, Korzheva N, Mustaev A, Murakami K, Nair S, Goldfarb A, Darst SA.  
644 2001. Structural mechanism for rifampicin inhibition of bacterial RNA polymerase. Cell  
645 104.
- 646 39. Jin DJ, Gross CA. 1988. Mapping and sequencing of mutations in the *Escherichia*  
647 *colirpoB* gene that lead to rifampicin resistance. J Mol Biol 202.
- 648 40. Severinov K, Soushko M, Goldfarb A, Nikiforov V. 1994. RifR mutations in the  
649 beginning of the *Escherichia coli rpoB* gene. MGG Mol Gen Genet 244.
- 650 41. Alifano P, Palumbo C, Pasanisi D, Talà A. 2015. Rifampicin-resistance, *rpoB*  
651 polymorphism and RNA polymerase genetic engineering. J Biotechnol 202.
- 652 42. Colclough AL, Scadden J, Blair JMA. 2019. TetR-family transcription factors in Gram-  
653 negative bacteria: Conservation, variation and implications for efflux-mediated



- 654 antimicrobial resistance. *BMC Genomics* 20.
- 655 43. Du S, Lutkenhaus J. 2014. SlmA Antagonism of FtsZ Assembly Employs a Two-pronged  
656 Mechanism like MinCD. *PLoS Genet* 10.
- 657 44. Pal S, Verma J, Mallick S, Rastogi SK, Kumar A, Ghosh AS. 2019. Absence of the  
658 glycosyltransferase wcaJ in *klebsiella pneumoniae atcc13883* affects biofilm formation,  
659 increases polymyxin resistance and reduces murine macrophage activation. *Microbiol*  
660 (United Kingdom) 165.
- 661 45. Inui T, Endo T, Matsushita T. 2000. Morphological changes and lysis induced by beta-  
662 lactams associated with the characteristic profiles of affinities of penicillin-binding  
663 proteins in *actinobacillus pleuropneumoniae*. *Antimicrob Agents Chemother* 44:1518–23.
- 664 46. Kessler NG, Caraballo Delgado DM, Shah NK, Dickinson JA, Moorea SD. 2021.  
665 Exopolysaccharide anchoring creates an extreme resistance to sedimentation. *J Bacteriol*  
666 203.
- 667 47. Meredith TC, Mamat U, Kaczynski Z, Lindner B, Holst O, Woodard RW. 2007.  
668 Modification of lipopolysaccharide with colanic acid (M-antigen) repeats in *Escherichia*  
669 *coli*. *J Biol Chem* 282.
- 670 48. Ren G, Wang Z, Li Y, Hu X, Wang X. 2016. Effects of lipopolysaccharide core sugar  
671 deficiency on colanic acid biosynthesis in *Escherichia coli*. *J Bacteriol* 198.
- 672 49. Palace SG, Wang Y, Rubin DHF, Welsh MA, Mortimer TD, Cole K, Eyre DW, Walker S,  
673 Grad YH. 2020. Rna polymerase mutations cause cephalosporin resistance in clinical  
674 *neisseria gonorrhoeae* isolates. *Elife* 9.

- 675 50. Nelson K, Selander RK. 1994. Intergeneric transfer and recombination of the 6-  
676 phosphogluconate dehydrogenase gene (gnd) in enteric bacteria. Proc Natl Acad Sci U S  
677 A 91.
- 678 51. Arakawa Y, Wacharotayankun R, Nagatsuka T, Ito H, Kato N, Ohta M. 1995. Genomic  
679 organization of the *Klebsiella pneumoniae* cps region responsible for serotype K2 capsular  
680 polysaccharide synthesis in the virulent strain chedid. J Bacteriol 177.
- 681 52. Chebotar I V., Emelyanova MA, Bocharova JA, Mayansky NA, Kopantseva EE,  
682 Mikhailovich VM. 2021. The classification of bacterial survival strategies in the presence  
683 of antimicrobials. Microb Pathog.
- 684

**Table 1: 50% Minimum Inhibitory Concentration (MIC50) of *K. pneumoniae* 43816 cultures after progressive low dose Exposure**

| <u>Antibiotic</u> | <u><i>K. pneumoniae</i></u><br><u>43816</u> | <u>Day 14 Untreated</u> | <u>Day 14 Adapted</u> | <u>Adapted</u><br><u>Large Colony</u> | <u>Adapted</u><br><u>Small Colony</u> |
|-------------------|---------------------------------------------|-------------------------|-----------------------|---------------------------------------|---------------------------------------|
| Tetracycline      | 0.5 µg/mL                                   | 1 µg/mL                 | 16 µg/mL*             | 8 µg/mL*                              | 8 µg/mL*                              |
| Cephalothin       | 4 µg/mL                                     | 4 µg/mL                 | 125 µg/mL*            | 500 µg/mL*                            | 125 µg/mL*                            |
| Amikacin          | 0.5 µg/mL                                   | 1 µg/mL                 | 2 µg/mL               | 0.5 µg/mL                             | 0.5 µg/mL                             |

\* Indicates MICs above the CLSI Cutoff for clinical resistance

**Table 2: Non-synonymous Single Nucleotide Polymorphisms and Genomic Changes Identified in 14 Day Adapted Culture**

| Position | Change in Sequence | Depth of Coverage | Gene/Promoter | Gene Family                              |
|----------|--------------------|-------------------|---------------|------------------------------------------|
| 10279    | G→C                | 43                | Gene          | SGNH/GDSL hydrolase                      |
| 10285    | G→C                | 43                | Gene          | SGNH/GDSL hydrolase                      |
| 10412    | T Deletion         | 56                | Promoter      | SGNH/GDSL hydrolase                      |
| 412527   | G Deletion         | 100               | Gene          | N-acetyltransferase                      |
| 1125537  | Insertion T        | 100               | Gene          | Globin                                   |
| 2008934  | Insertion TTTCGCTA | 100               | Gene          | TetR/AcrR Transcription regulator        |
| 2063994  | C Deletion         | 100               | Gene          | ABC Transporter                          |
| 3225592  | C Deletion         | 100               | Gene          | RmuC DNA Recombination                   |
| 5188116  | T → G              | 100               | Gene          | UDP Phosphate Glucose Phosphotransferase |
| 2657272  | G Deletion         | 100               | Promoter      | Peptide Chain Release Factor 3           |
| 1078904  | C Deletion         | 100               | Promoter      | LysR Transcriptional Regulator           |
| 1294495  | G Deletion         | 100               | Promoter      | Type II Asparaginase                     |
| 1823692  | A Insertion        | 100               | Promoter      | Pyrimidine Photo-lyase                   |
| 5050494  | A Insertion        | 100               | Promoter      | Cyclic Di-GMP Phosphodiesterase          |

**Table 3: SNPs and Genomic Changes Identified in Large and Small Colony Variants of Adapted Culture**

| Colony Variant        | Position  | Original           | New            | Coverage<br>(Small/Large) | Gene                                                          |
|-----------------------|-----------|--------------------|----------------|---------------------------|---------------------------------------------------------------|
| Small and Large       | 2,008,948 | .                  | Insert TATTCGC | 100/52                    | TetR/AcrR family transcriptional regulator                    |
| Small and Large       | 3,191,984 | A                  | T              | 100/100                   | <i>rpoB</i> /DA-directed RNA polymerase subunit beta          |
| Large                 | 1,548,640 | Unspecified        | Unspecified    | 15                        | ComEC family protein                                          |
| Small                 | 4,676,685 | T                  | G              | 100                       | YfiR family protein                                           |
| Small                 | 5,187,773 | Deletion 2,103 bp. | .              | 100                       | <i>wcaJ</i> and <i>gndA</i>                                   |
| Final adapted mixture | 5,187,772 | T                  | G              | 64                        | <i>wcaJ</i> Undecaprenyl phosphate-glucose phosphotransferase |
| Final adapted mixture | 5,189,876 | unspecified        | unspecified    | 64                        | <i>gndA</i> NADP-dependent phosphogluconate dehydrogenase     |

Figure 1:

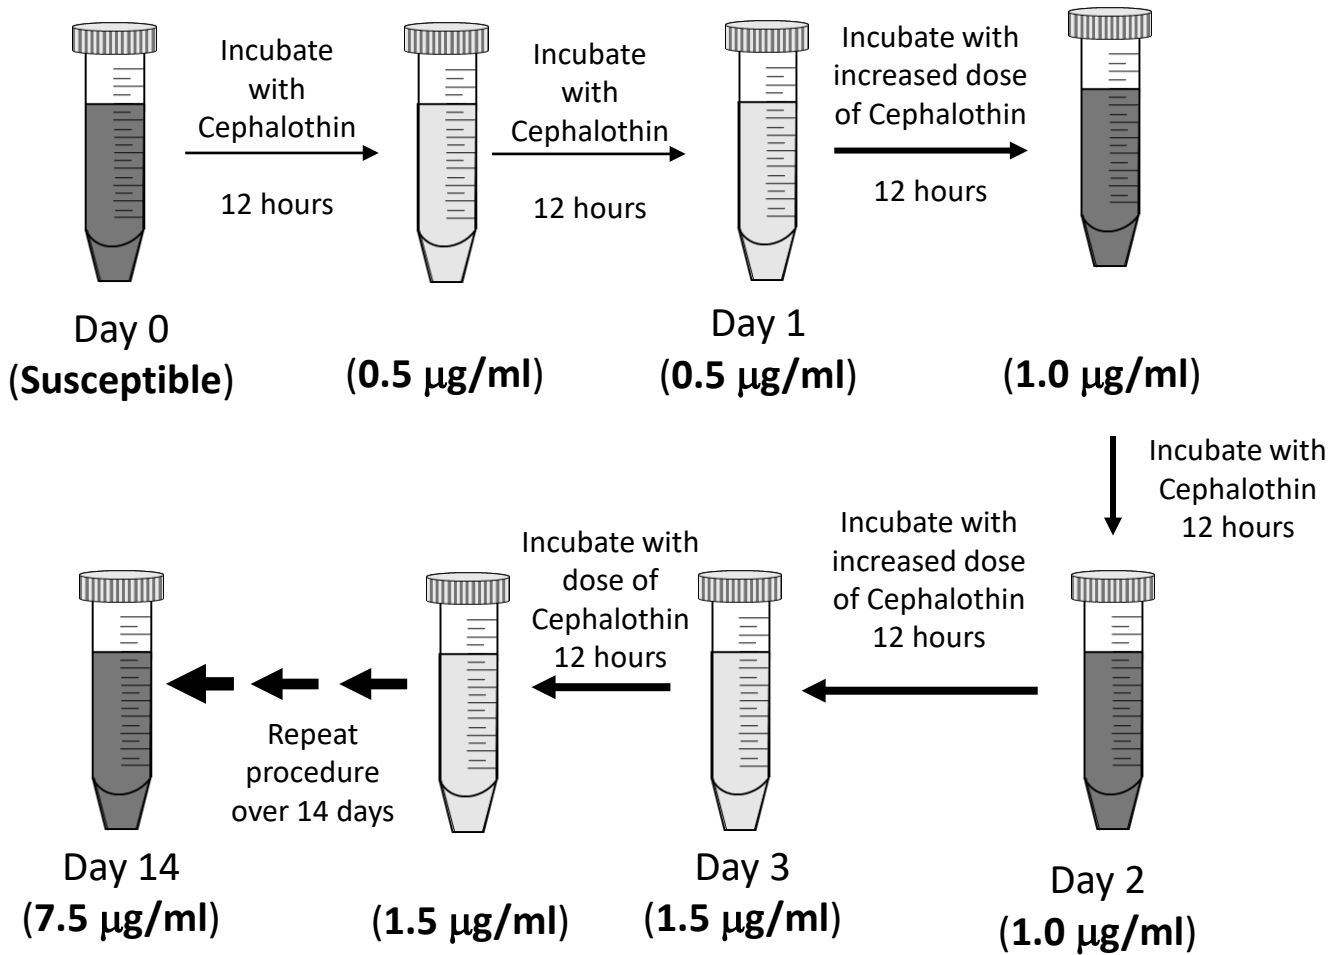

Figure 2:

**A.**

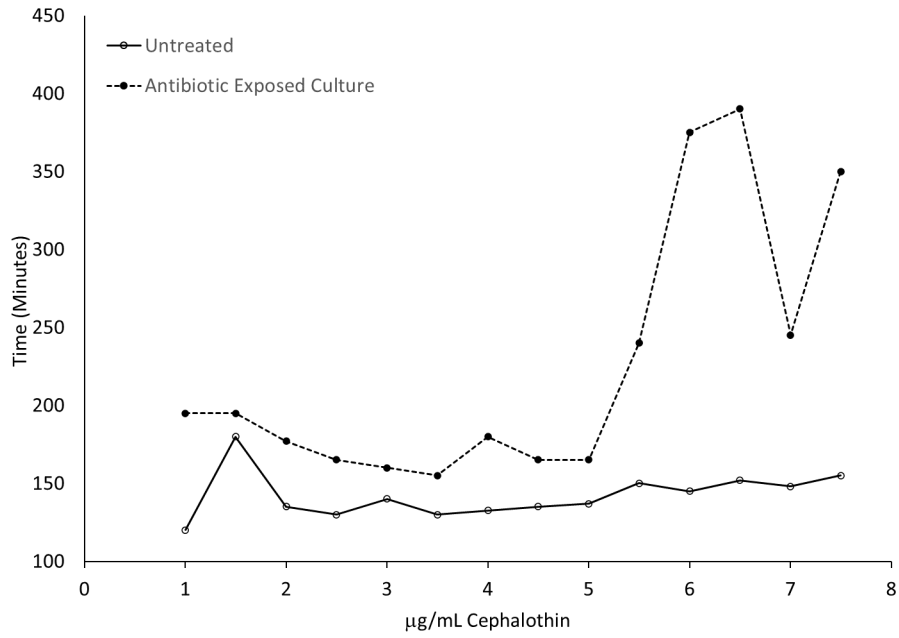

**B.**

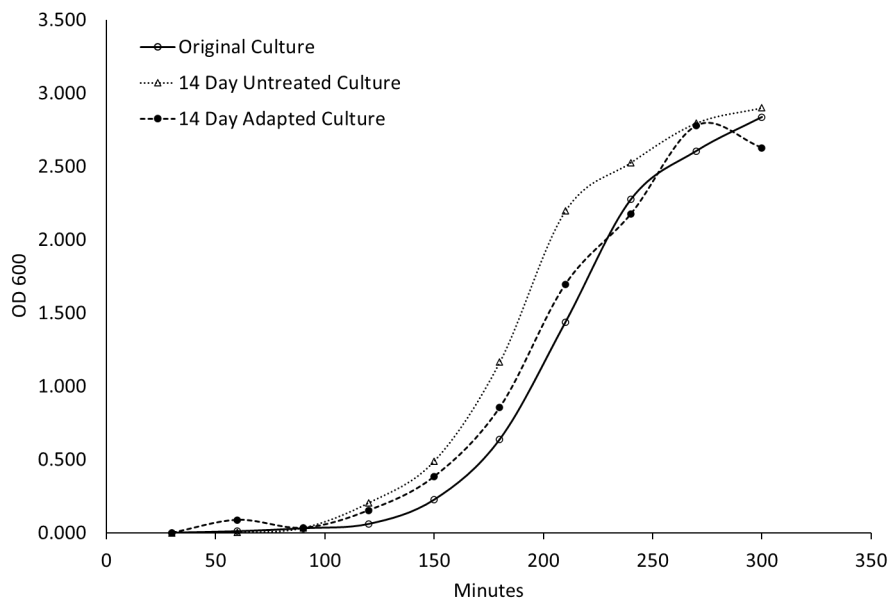

Figure 3:

A.

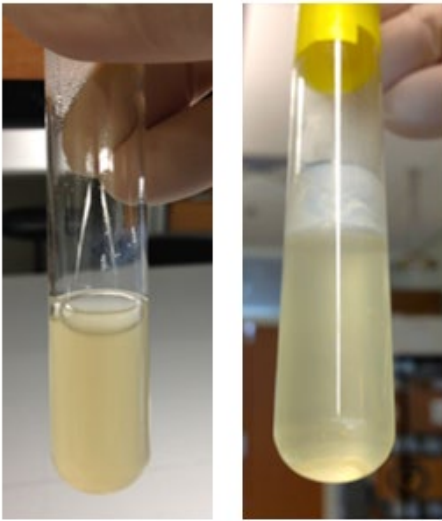

Untreated  
Culture

Adapted  
Culture

B.

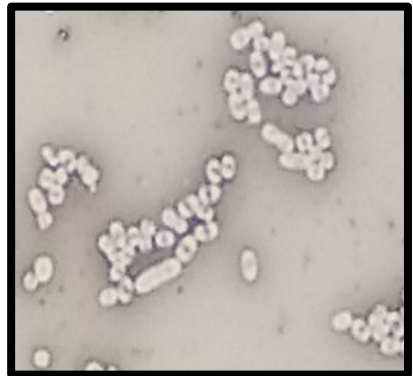

C.

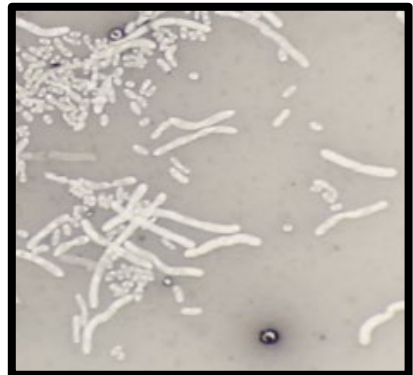

D.

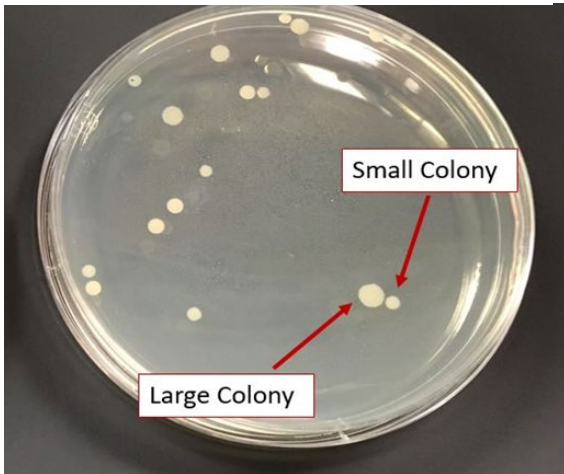

Small Colony

Large Colony



Figure 4:

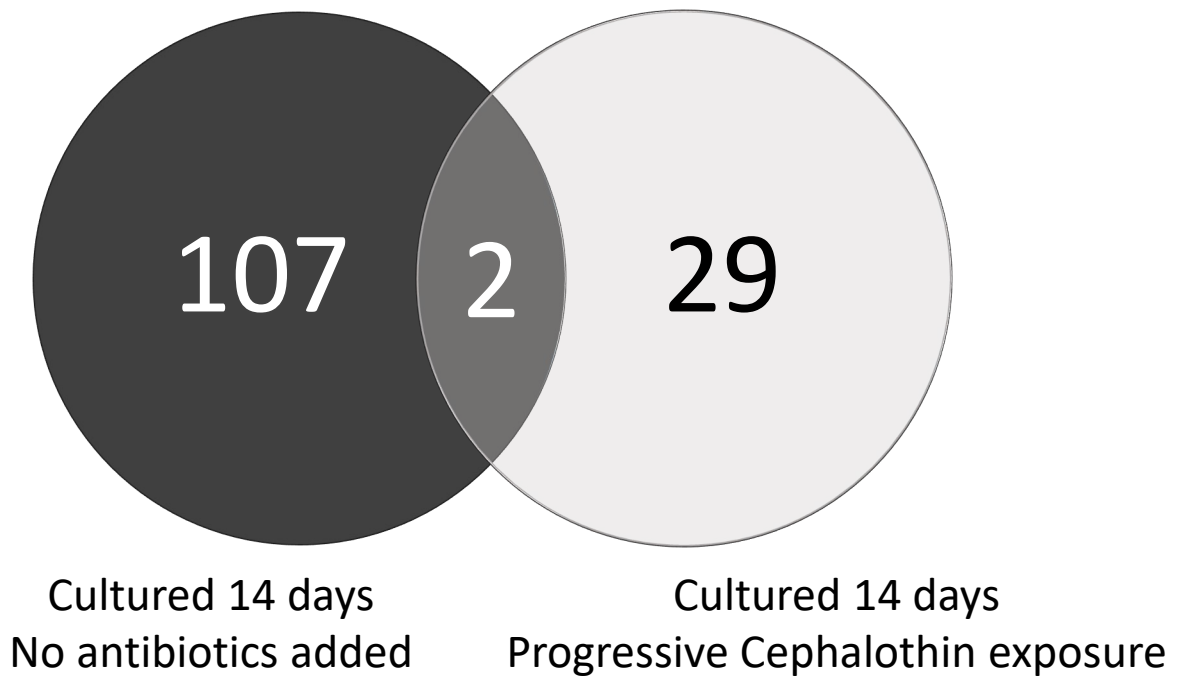

Figure 5:

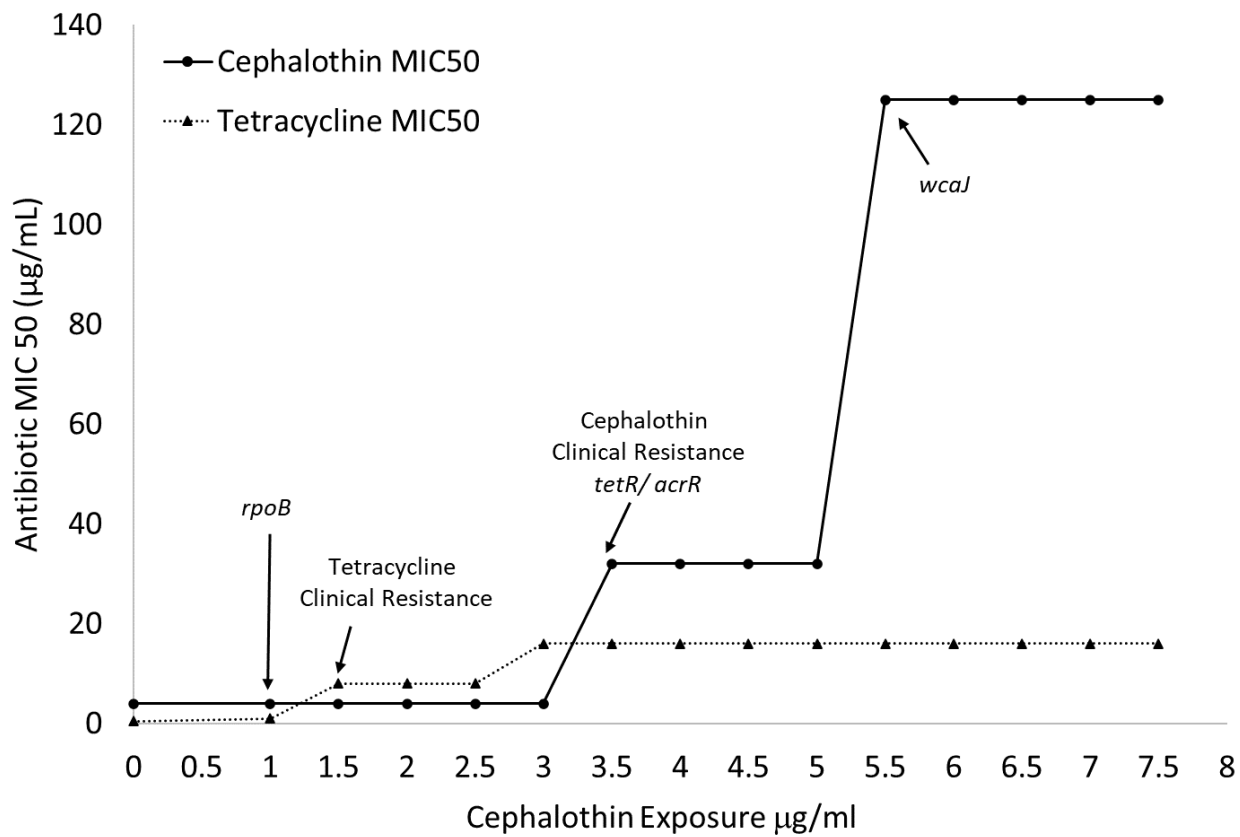

Figure 6:

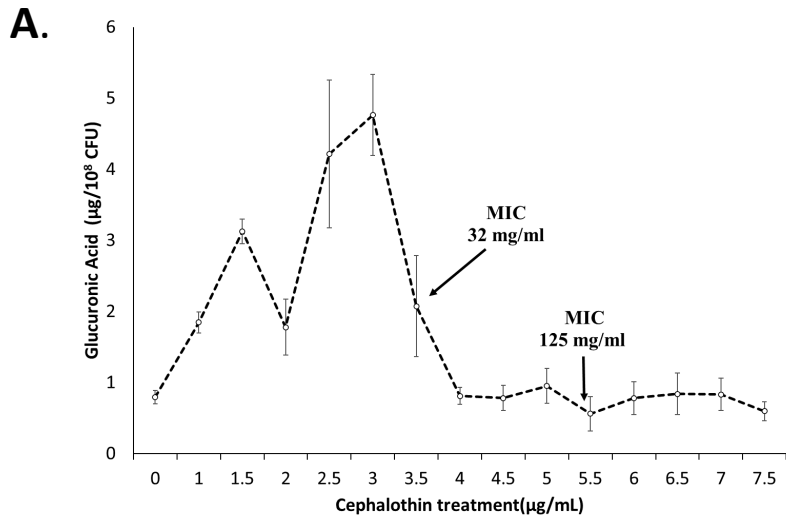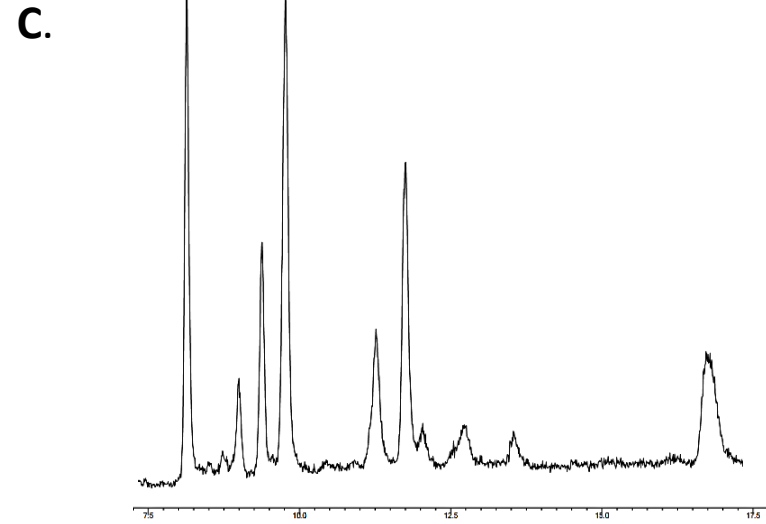

Untreated

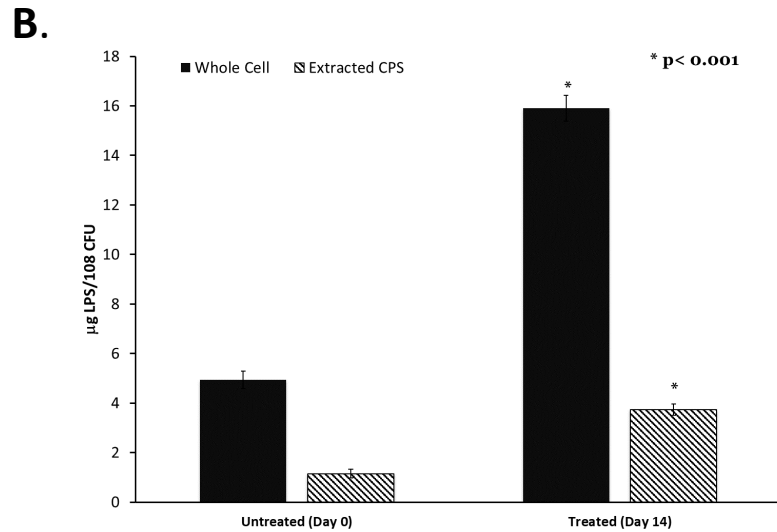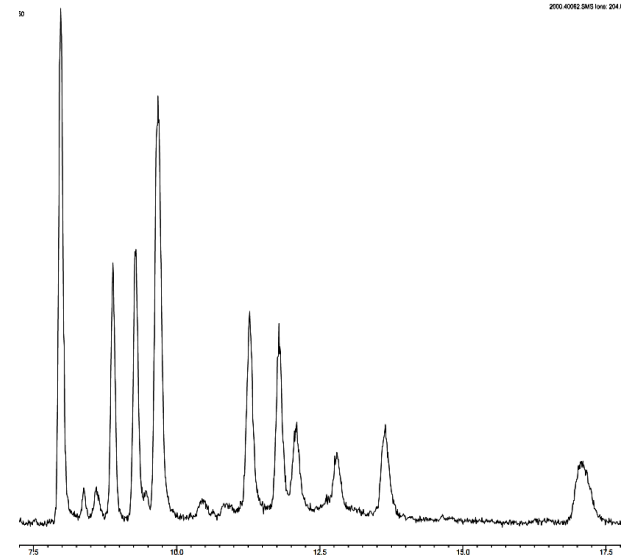

14 day Adapted Culture
